# Supplementary material for: Shoot Regeneration Is Not a Single Cell Event
Source: PubMed Central journal article supplement (PMC7823732; doi:10.3390/plants10010058), 2020-12-29
Supplement: plants-10-00058-s001.pdf [file plants-10-00058-s001.pdf]

## Shoot regeneration is not a single cell event

Patharajan Subban, Yaarit Kutsher, Dalia Evenor, Eduard Belausov, Hanita Zemach, Adi Faigenboim, Samuel Bocobza, Mike Timko, Moshe Reuveni.

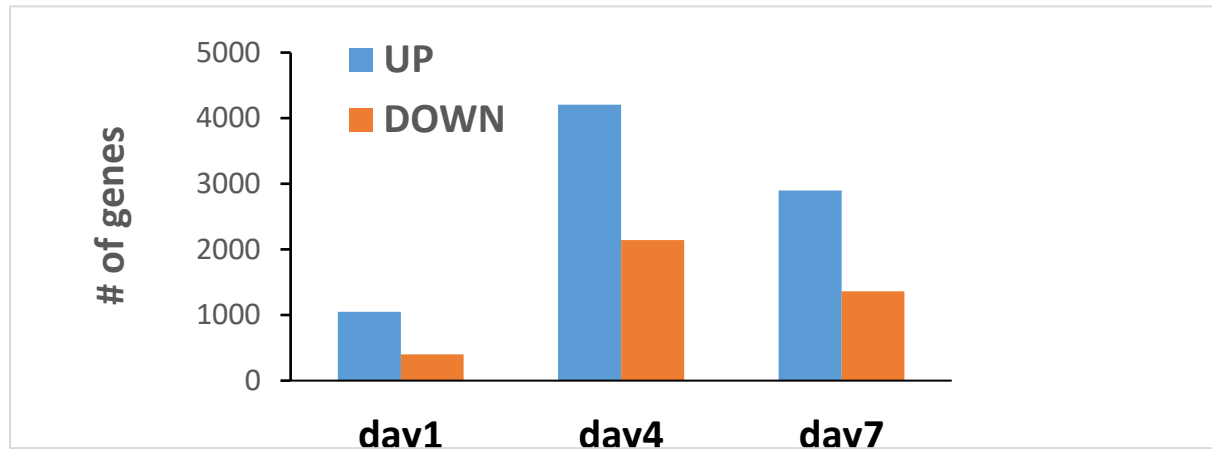

Figure S1: Number of genes that were up or down-regulated during the induction period on Reg medium.

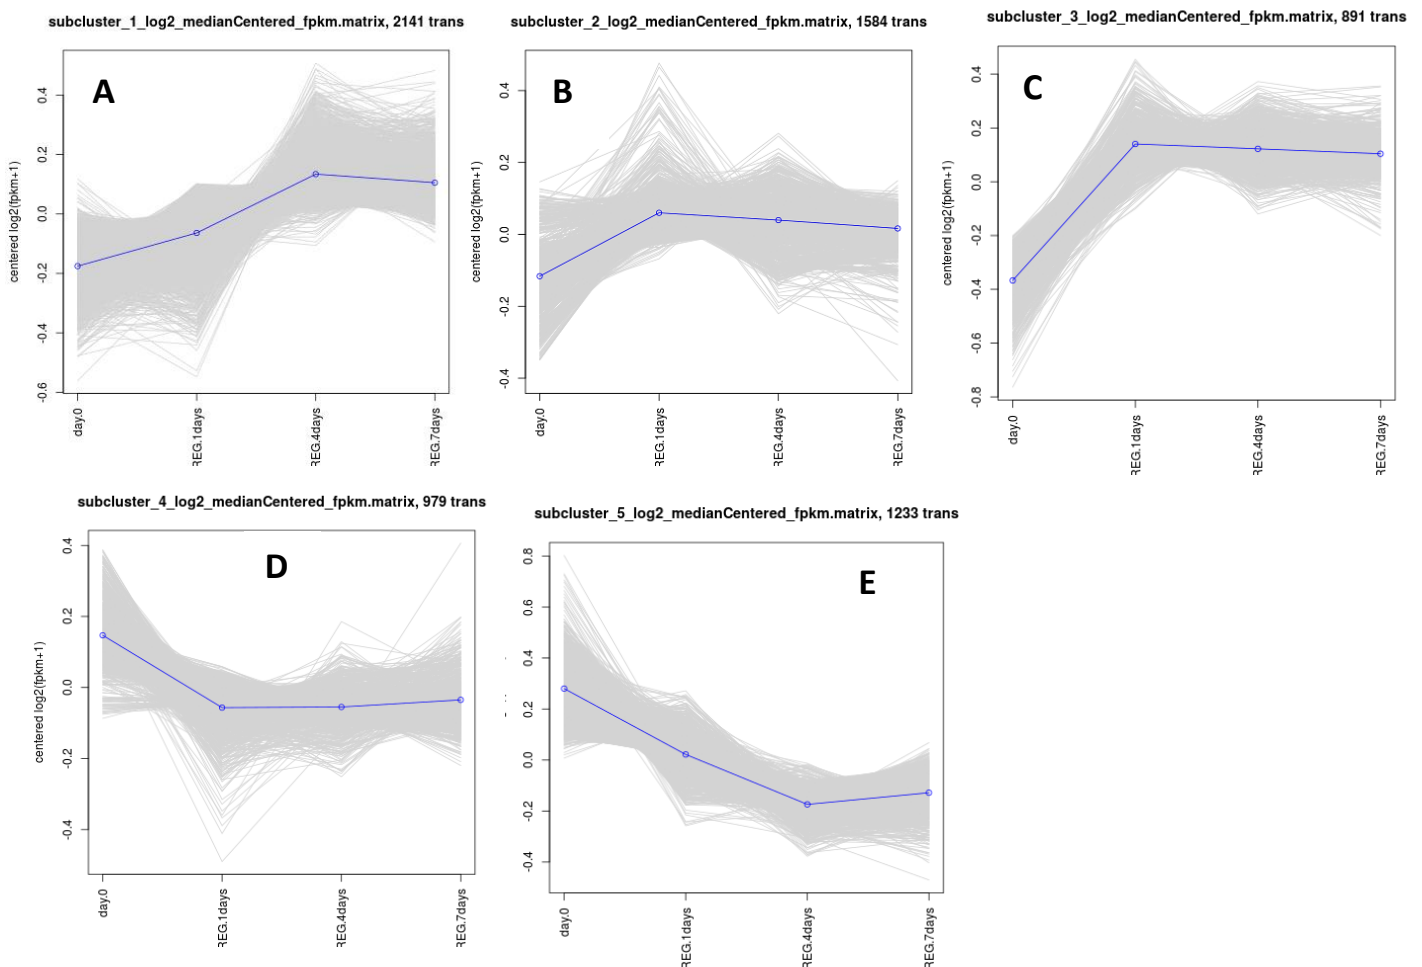

Fig. S2: Transcript changes during shoot induction period on Reg medium show five distinct sub cluster. **A**: sub cluster of genes that upregulate mostly on day 4; **B**: sub cluster of genes that upregulate moderately on day 1; **C**: sub cluster of genes that upregulate sharply on day 1; **D**: sub cluster of genes that downregulate on day 1; **E**: sub cluster of genes that downregulate on day 4.

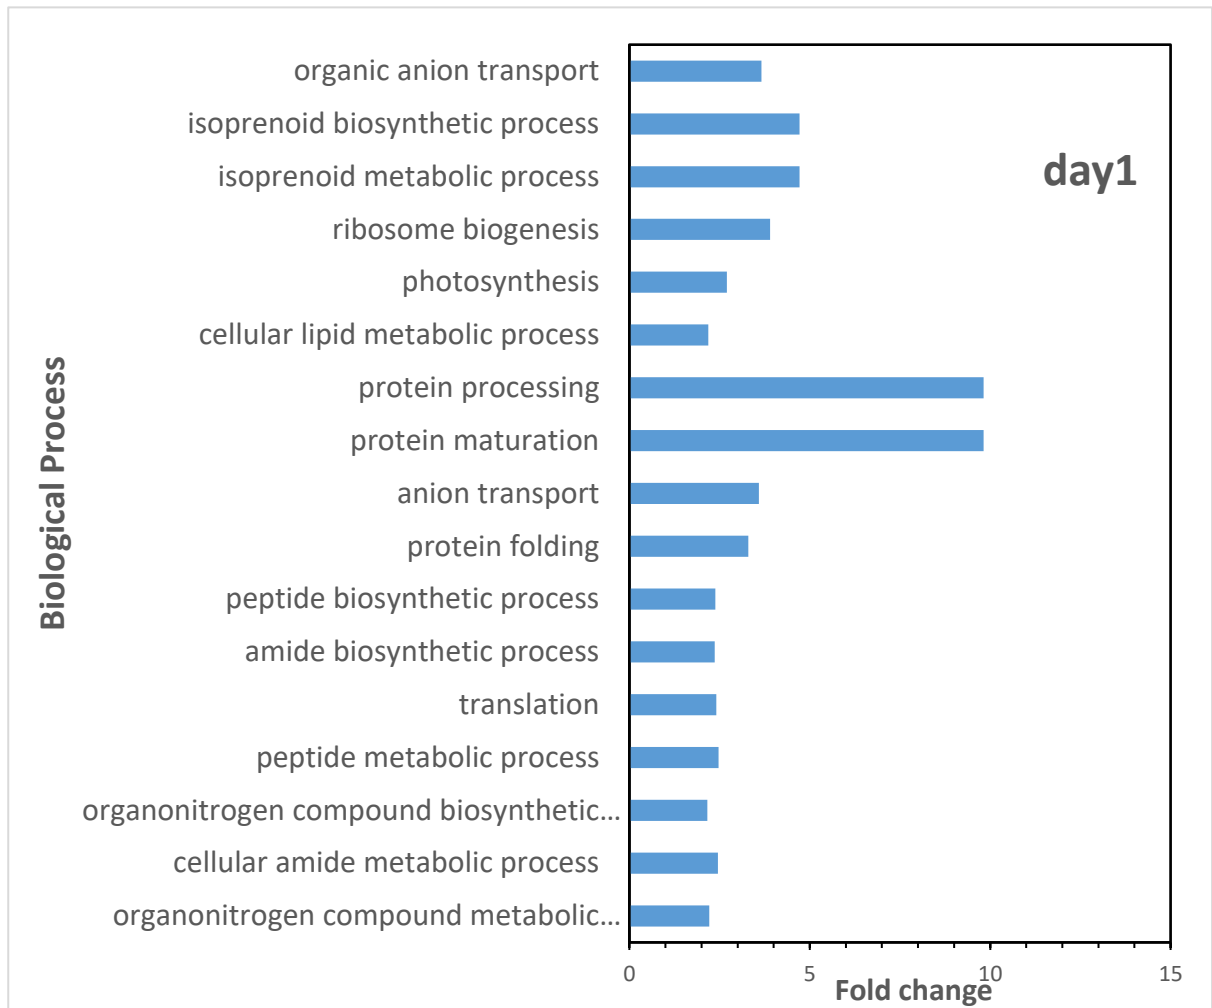

**Figure S3.** transcript analyses of biological processes that upregulate at day 1 compared to day 0 of the induction of shoot regeneration.

Day4

Biological process

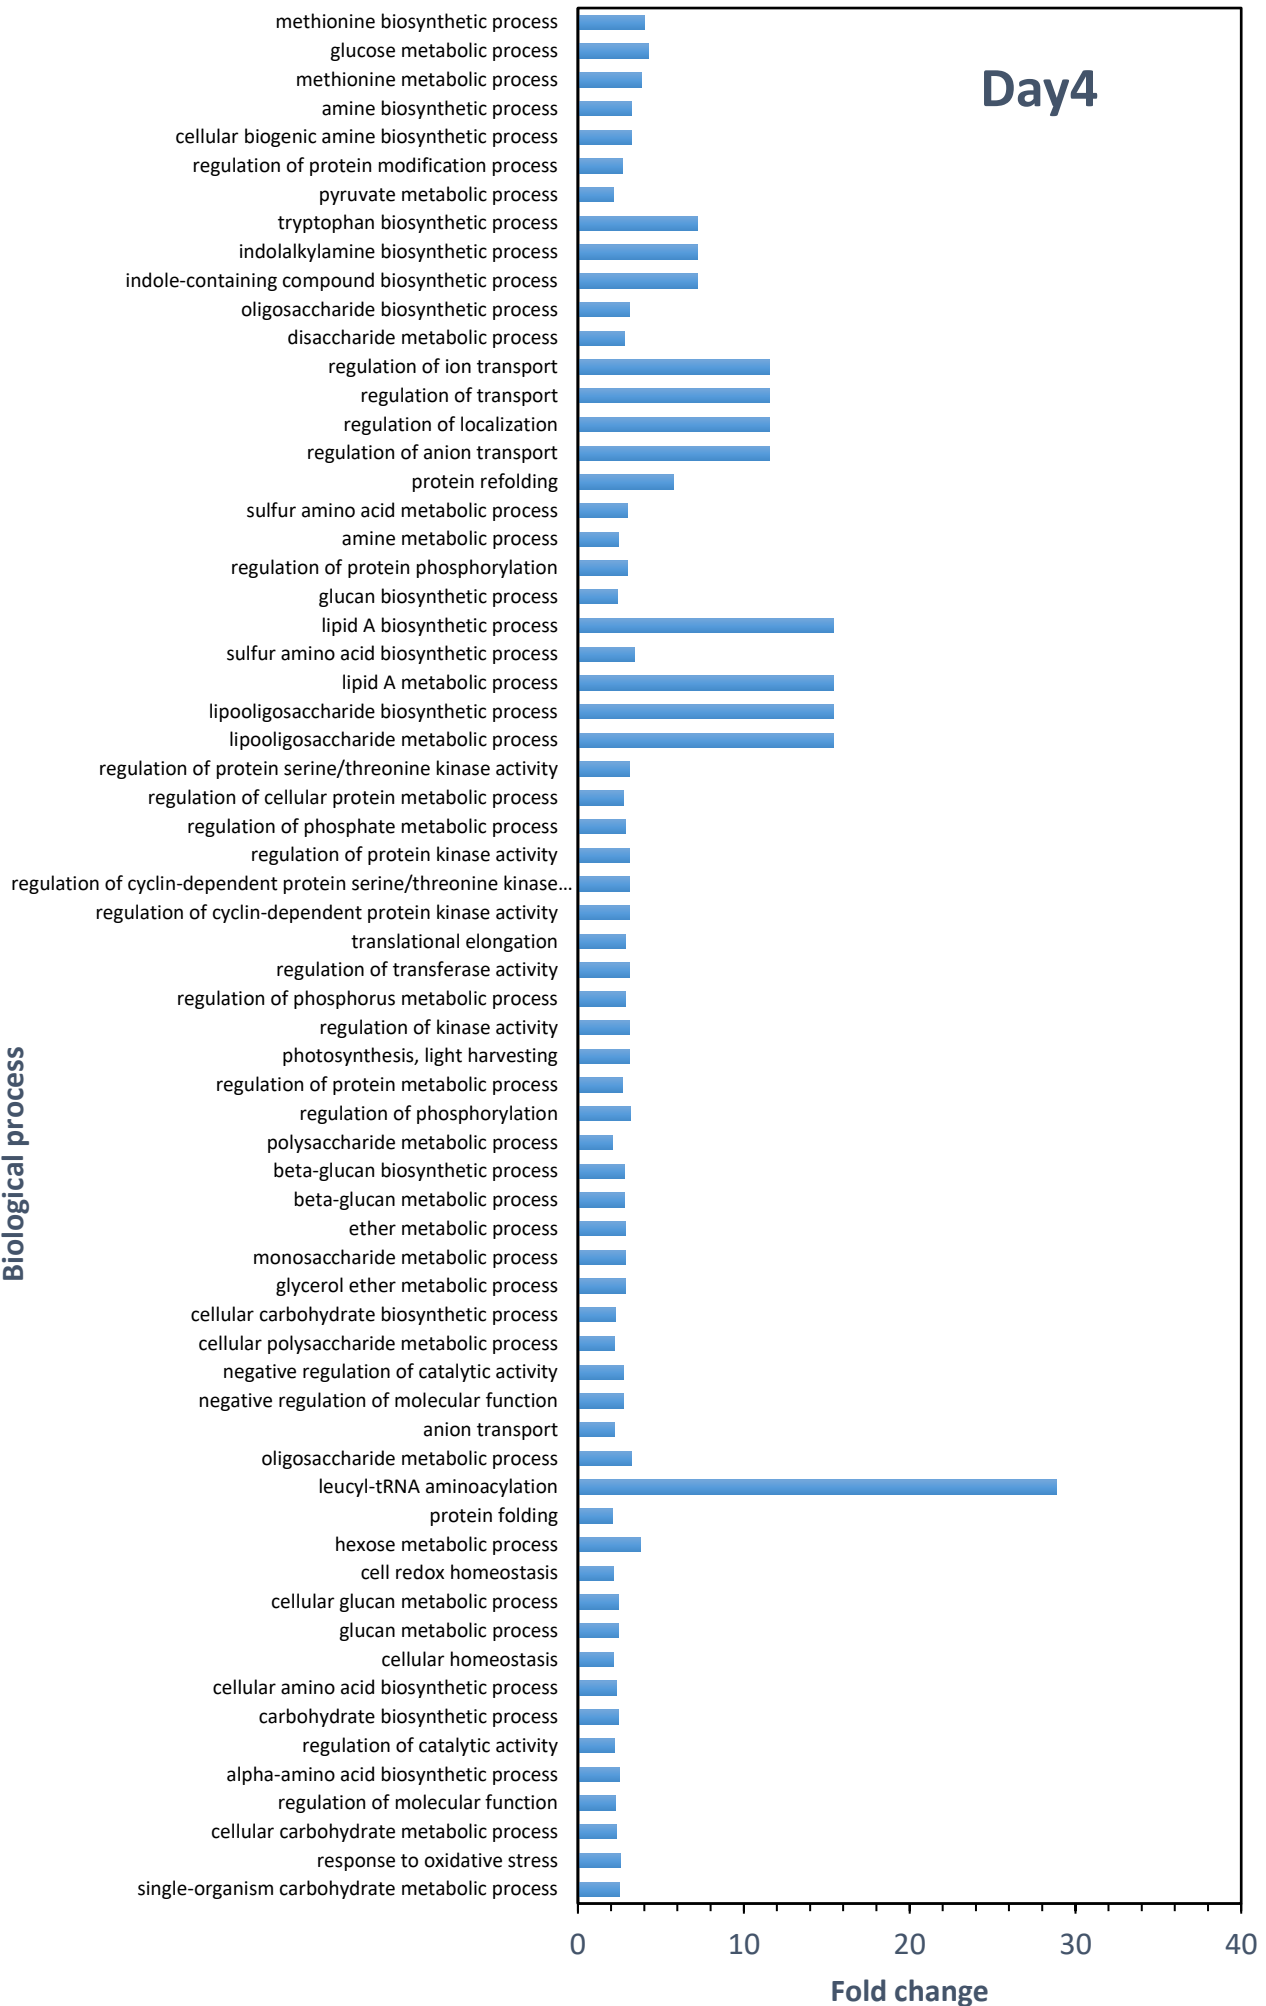

**Figure S4.** transcript analyses of biological processes that upregulate at day 4 compared to day 0 of the induction of shoot regeneration.

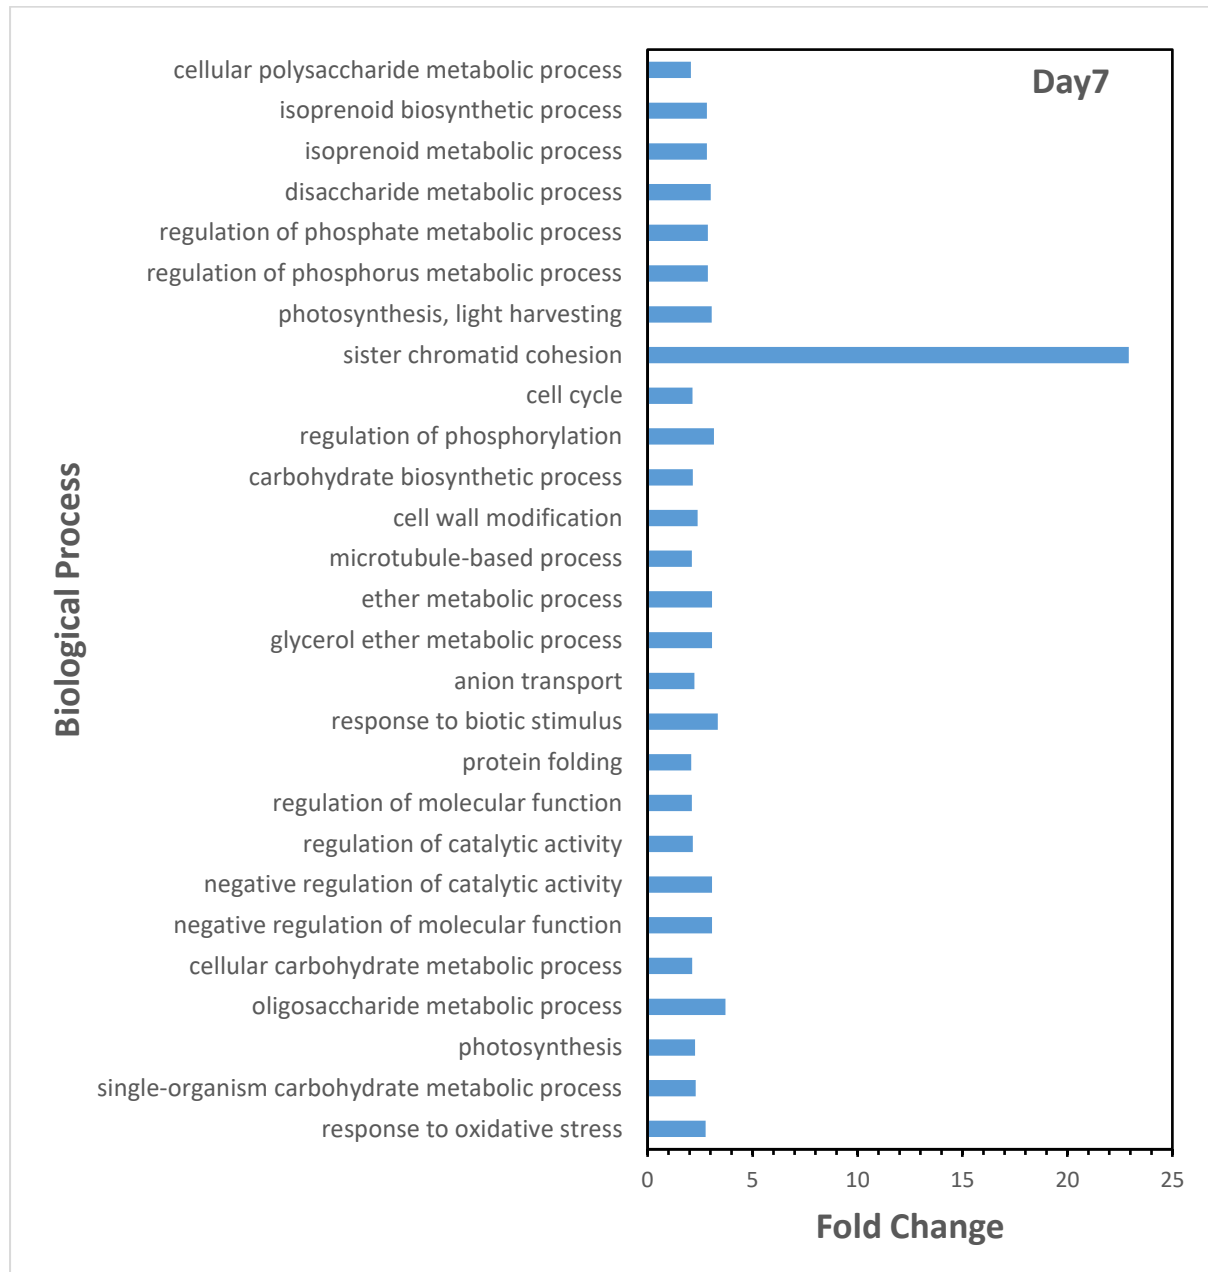

**Figure S5.** Transcript analyses of biological processes that upregulate at day 7 compared to day 0 of the induction of shoot regeneration.

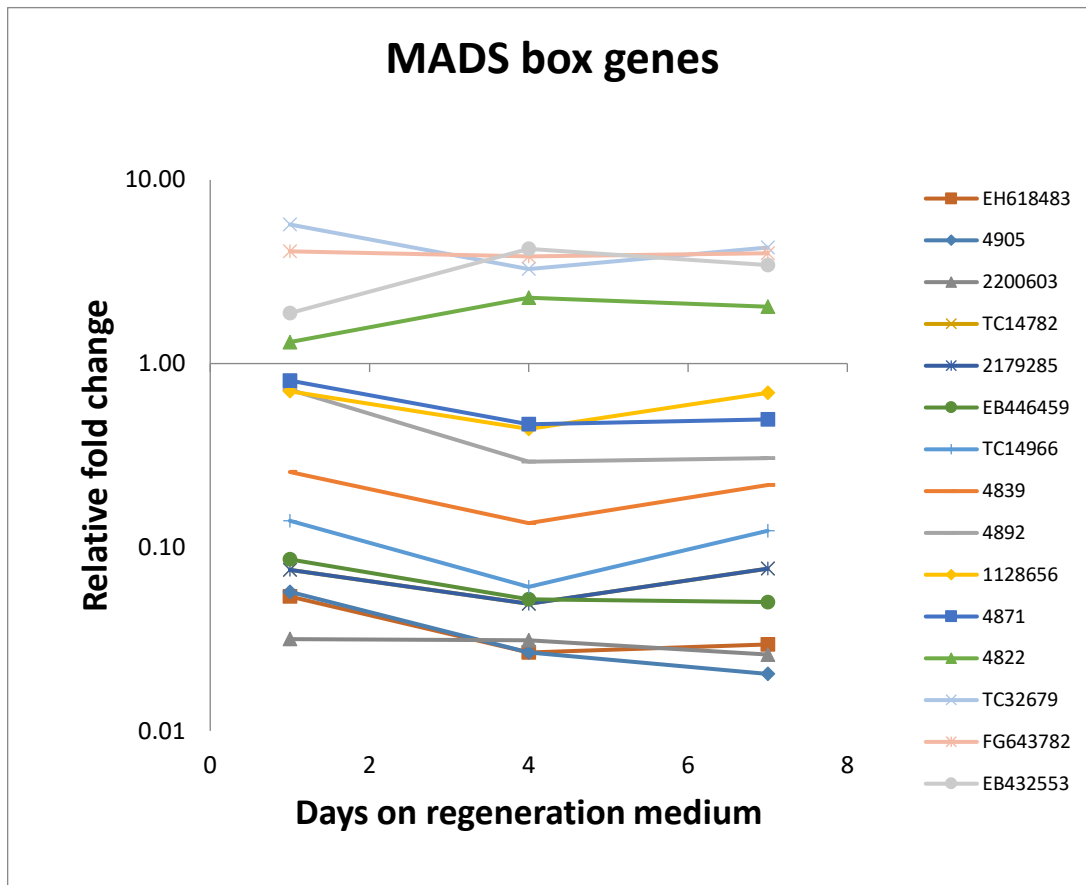

**Figure S6.** Transcript analyses of MADS box gene family during the 7 c days compared to day 0 of the induction of shoot regeneration.

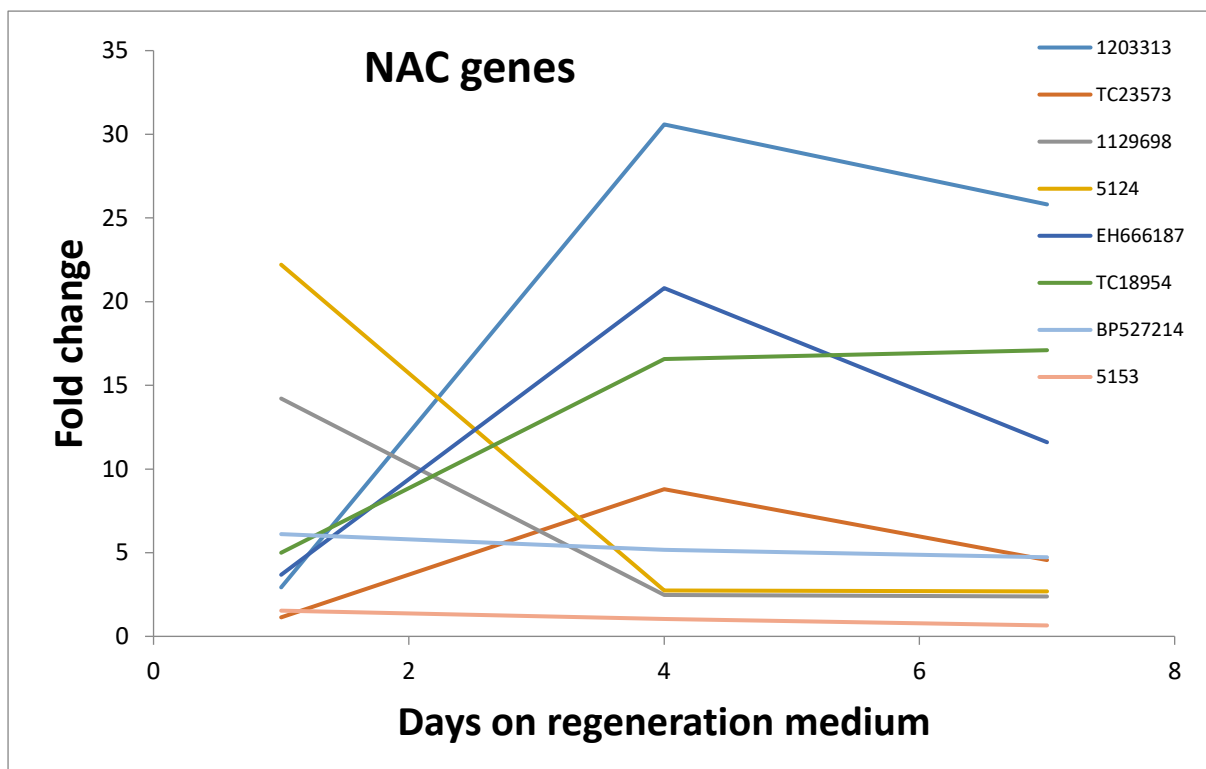

**Figure S7.** Transcript analyses of NAC gene family during the 7 c days compared to day 0 of the induction of shoot regeneration.

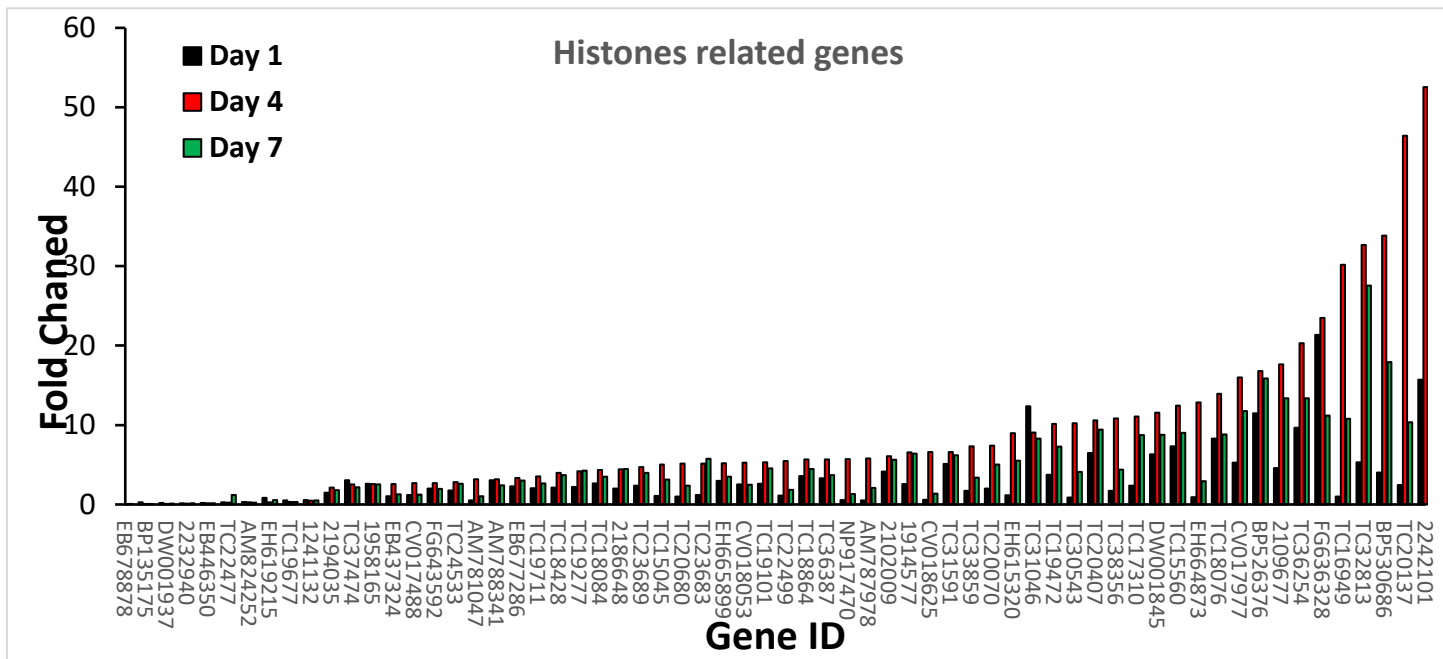

**Figure S8.** Transcript analyses of histone related genes during the 7 c days compared to day 0 of the induction of shoot regeneration.

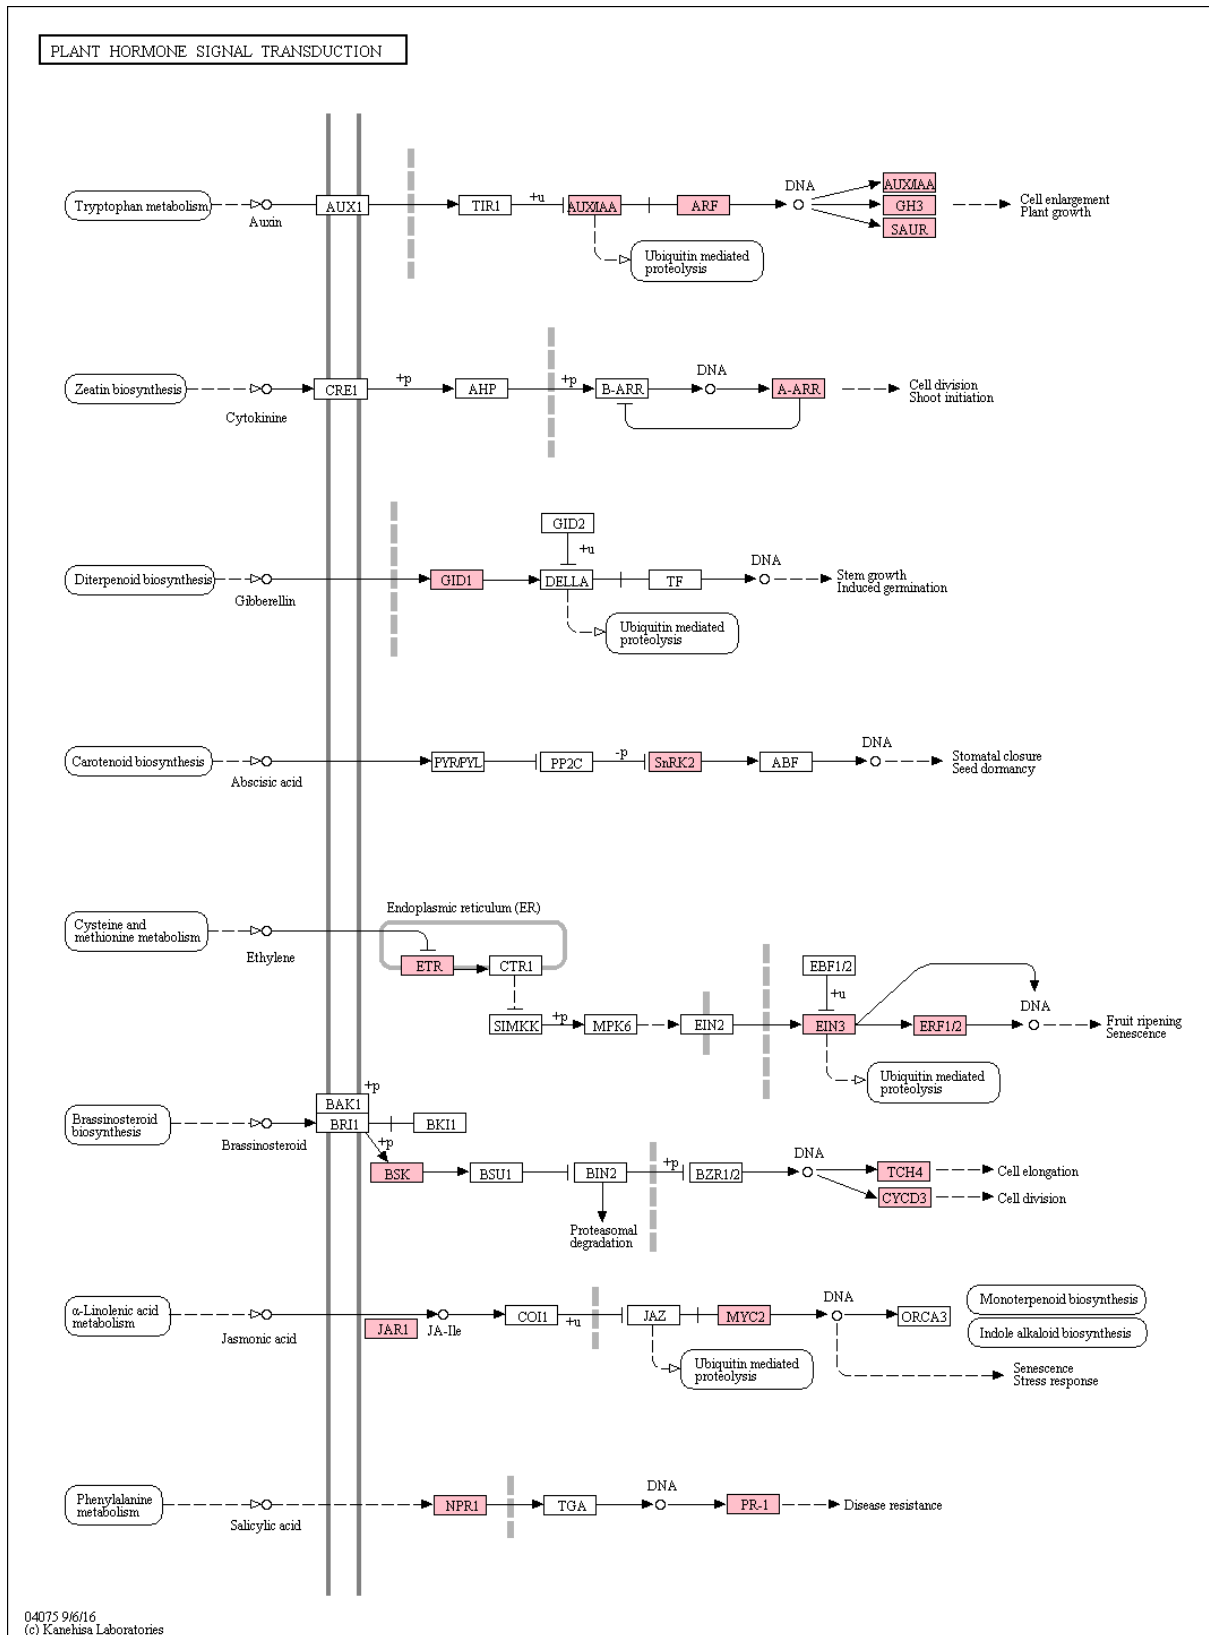

**Figure S9.** Transcript analyses of phytohormones signal transduction pathways at the 1 day compared to day 0 of the induction of shoot regeneration. Genes that are boxed in red show change.
